# Supplementary material for: Functional annotation of putative QTL associated with black tea quality and drought tolerance traits
Source: PubMed Central journal article supplement (PMC6365519; doi:10.1038/s41598-018-37688-z), 2019-02-06
Supplement: 41598_2018_37688_MOESM1_ESM.pdf [file 41598_2018_37688_MOESM1_ESM.pdf]

1 **ELECTRONIC SUPPLEMENTARY MATERIALS**

2 The following information accompanies the article:

3

4 **Functional annotation of putative QTL associated with black tea quality and drought tolerance traits**

5 Robert. K. Koech<sup>1, 2</sup>, Pelly M. Malebe<sup>1</sup>, Christopher Nyarukowa<sup>1</sup>, Richard Mose<sup>3</sup>, Samson M. Kamunya<sup>2</sup>, Fourie Joubert<sup>1</sup> and Zeno Apostolides<sup>1\*</sup>

6 <sup>1</sup>Department of Biochemistry, Genetics and Microbiology, University of Pretoria, Pretoria 0002, South Africa

7 <sup>2</sup>Kenya Agriculture and Livestock Research Organization, Tea Research Institute, P.O. Box 820, Kericho 20200, Kenya

8 <sup>3</sup>James Finlay (Kenya) Limited, P.O. Box 223, Kericho 20200, Kenya.

9 \*Corresponding author: za@up.ac.za

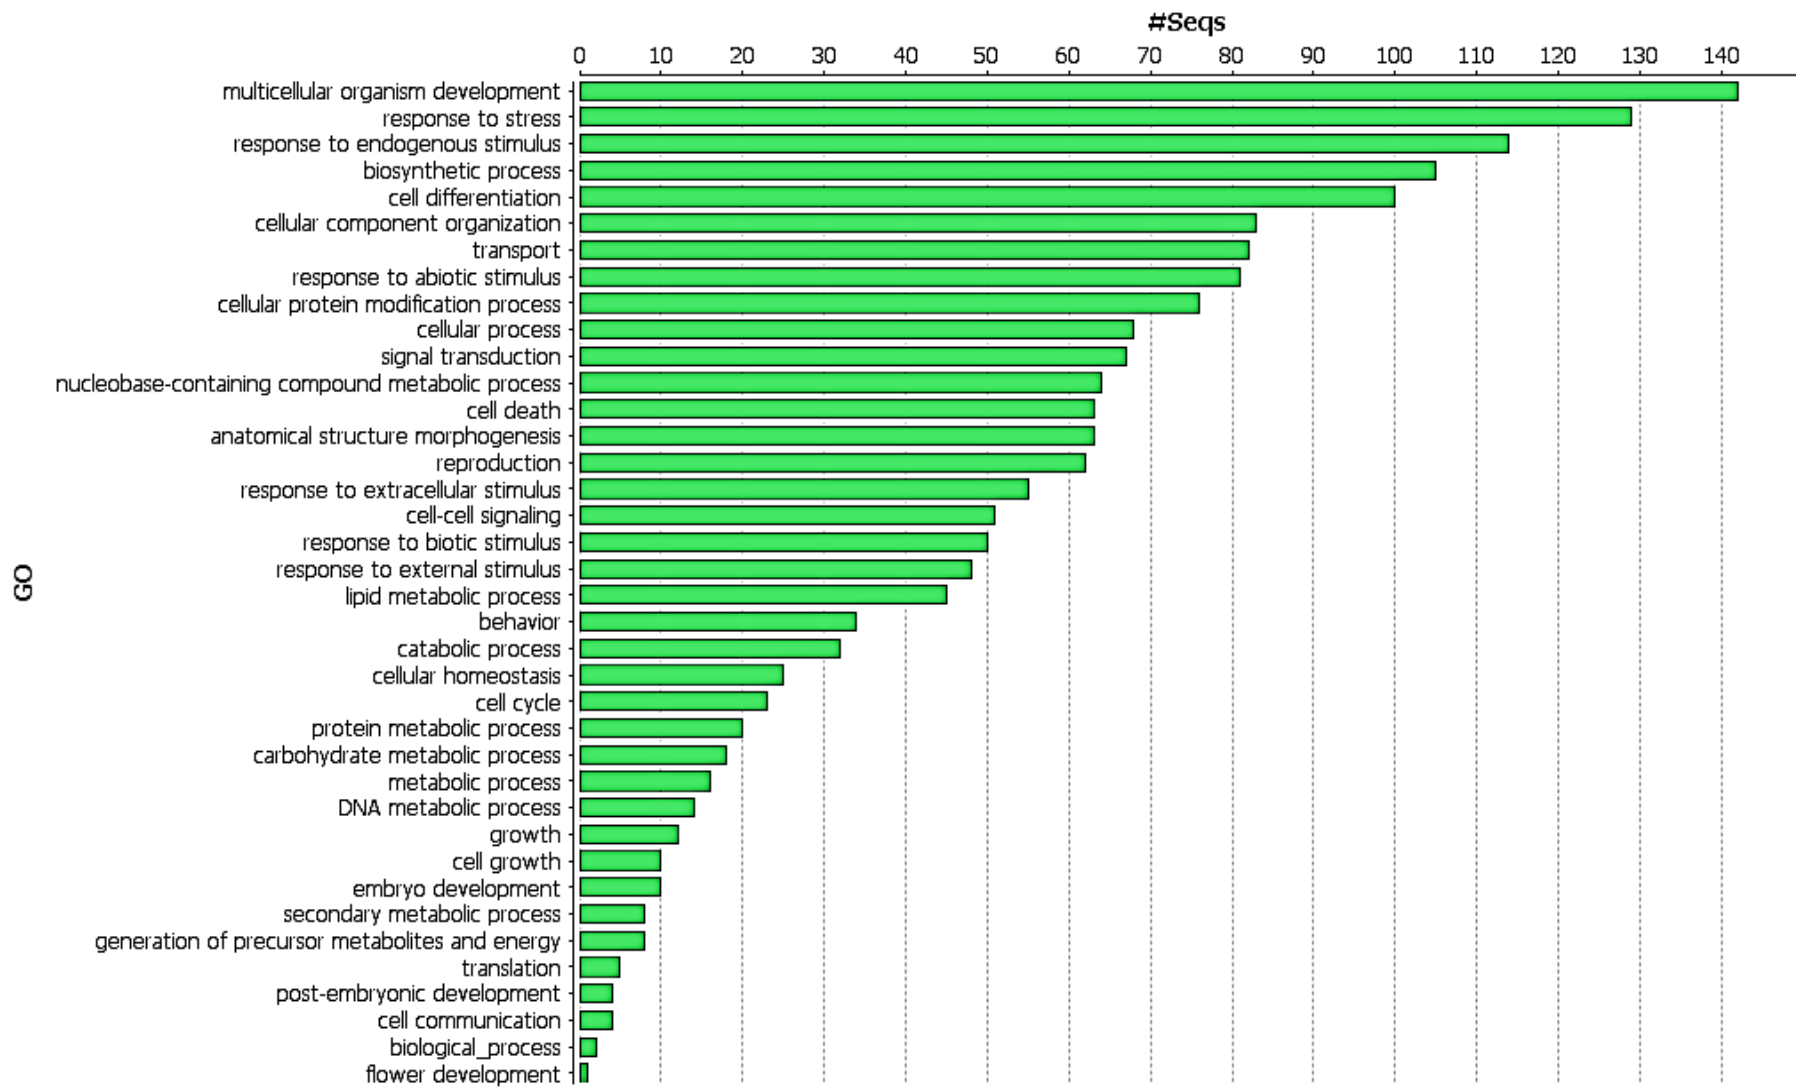

10

11 Supplementary Fig. 1. Gene ontology classification of top 20 sub-groups of biological processes.

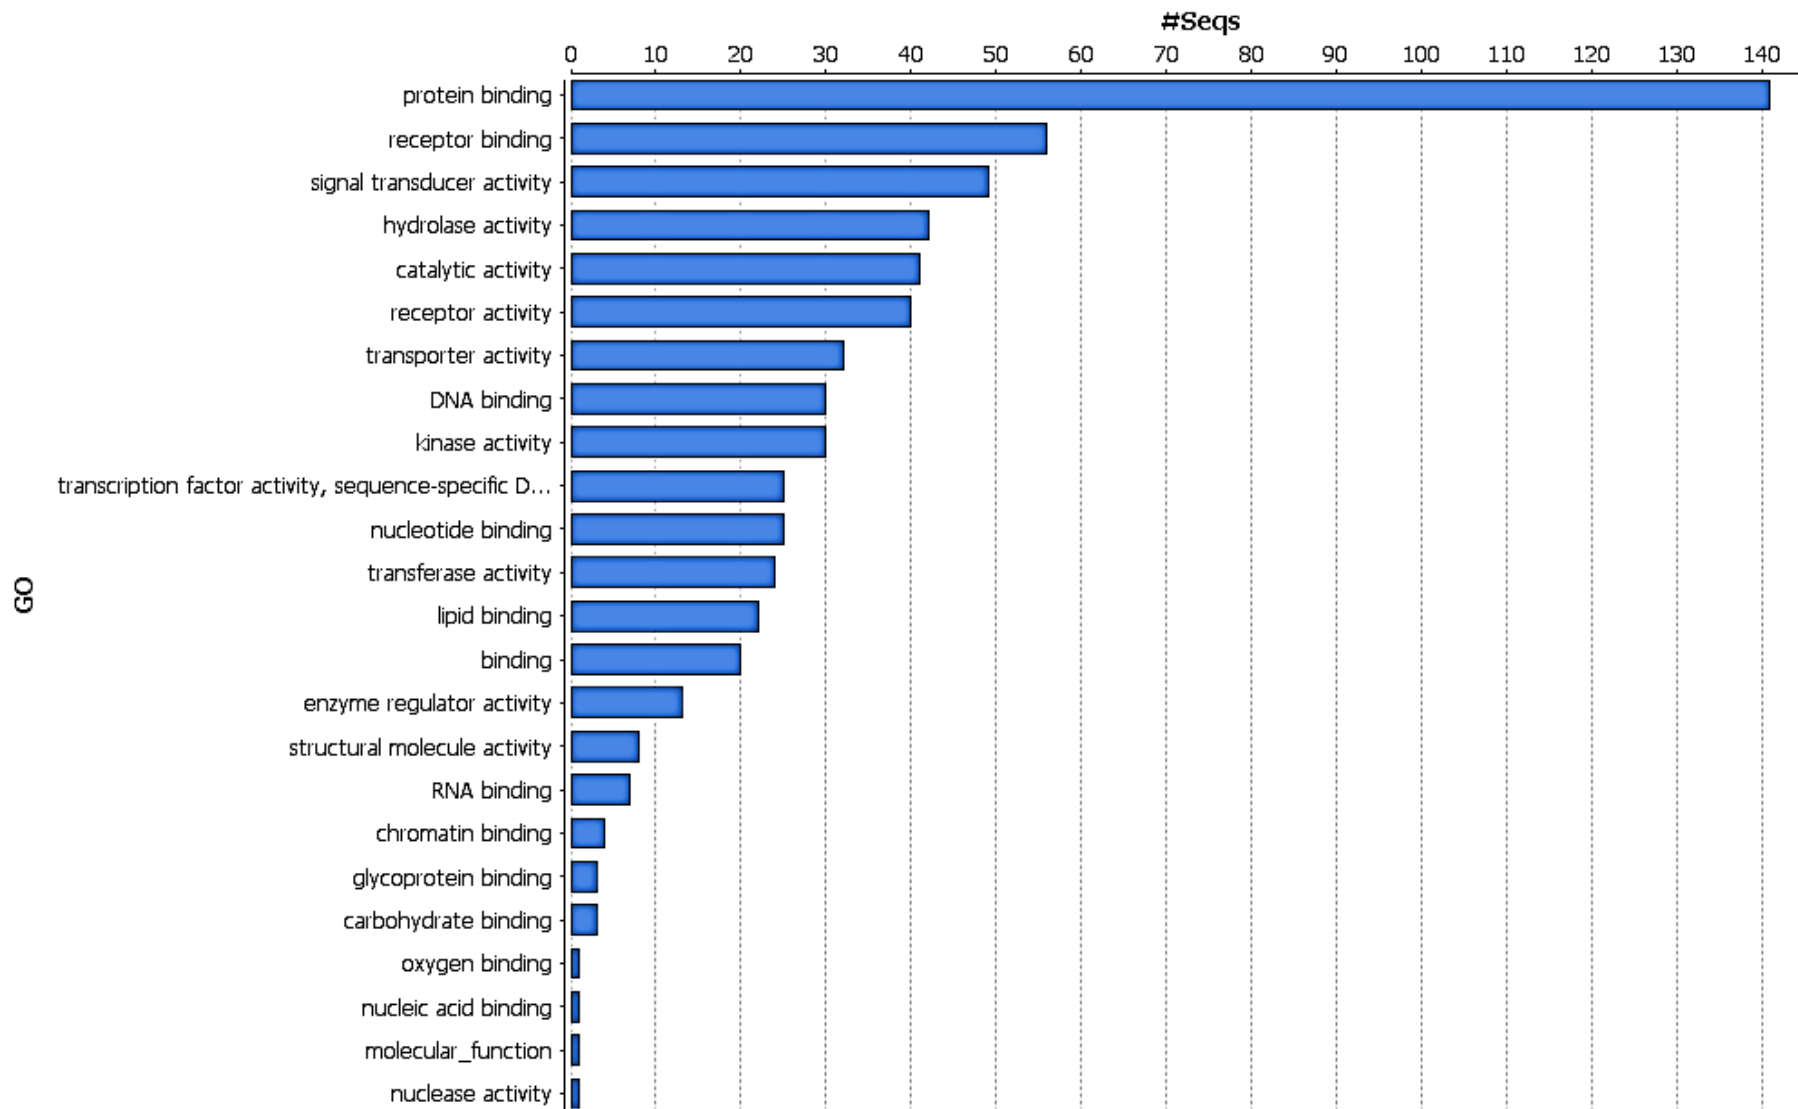

12

13 Supplementary Fig. 2. Gene ontology classification of top 20 sub-groups of molecular functions.

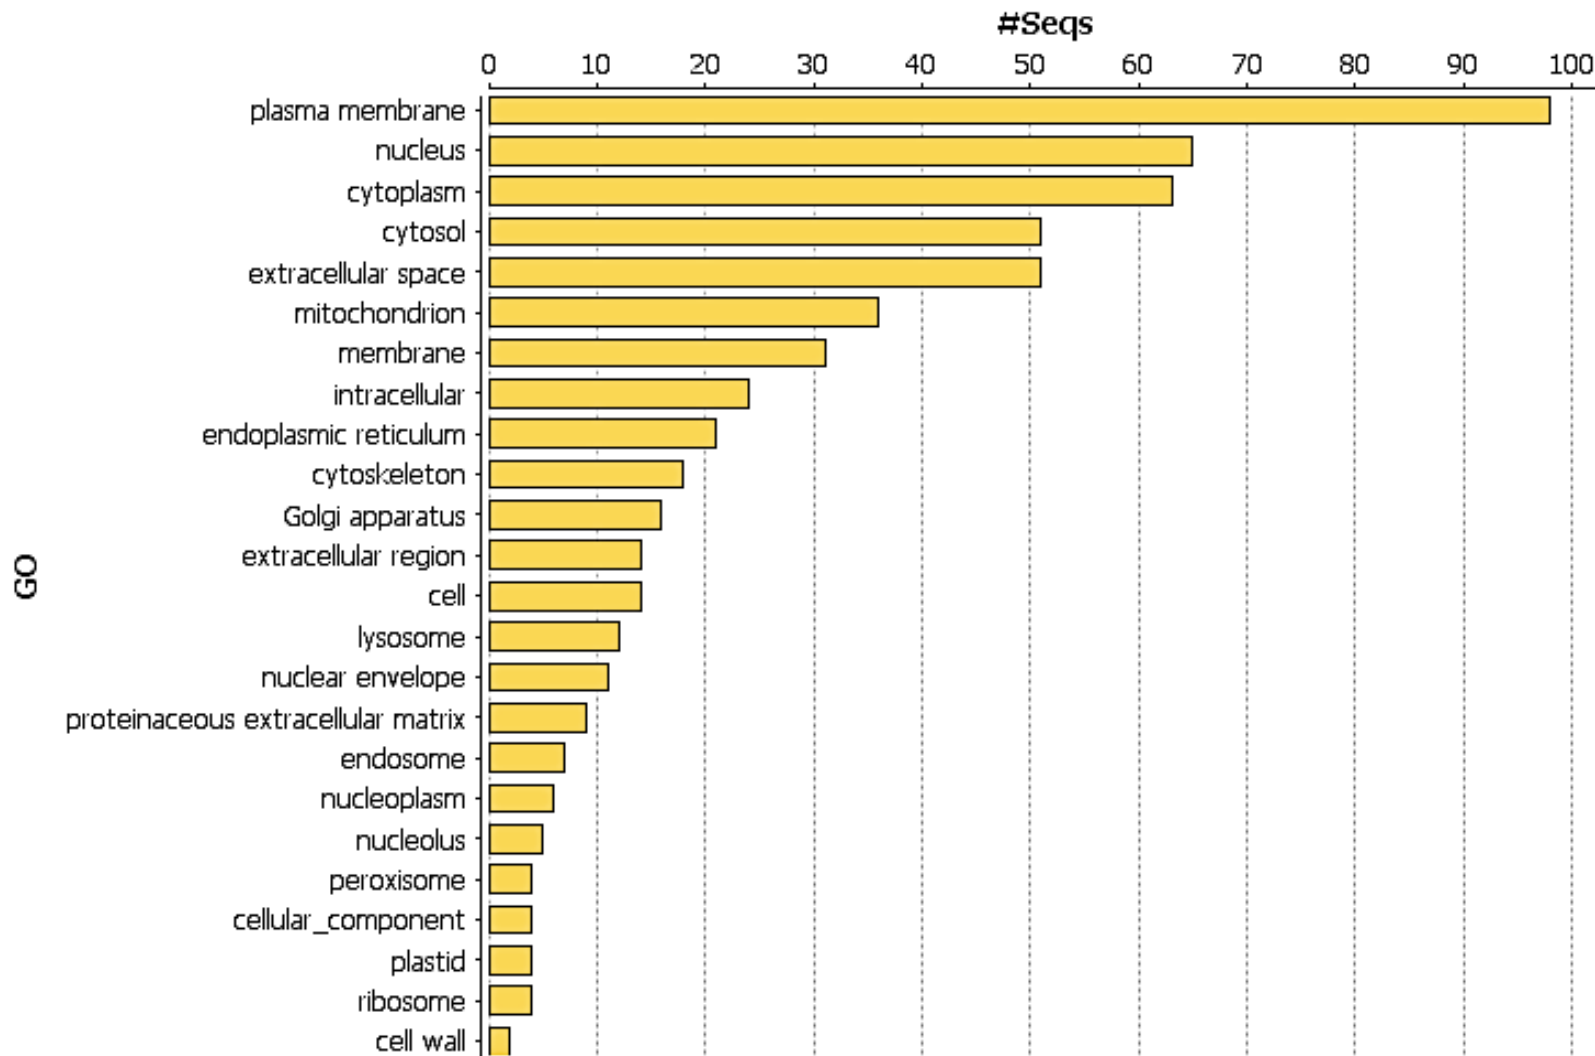

17 Supplementary Table 1. List of putative QTL identified from KEGG pathways with GO terms in *C. sinensis* transcriptome

| Nr | Trait            | Locus   | LG | Pos (cM) | LOD | PEV | E-Value | #GO | GO IDs                                                                                                                                               | GO Name                                                                                                                                                                                                                                       | Pathway                                              | #Enzs in Pathway | Enzyme Codes                                                                                                                                                                                                                                                                                                                                                                                                                 |
|----|------------------|---------|----|----------|-----|-----|---------|-----|------------------------------------------------------------------------------------------------------------------------------------------------------|-----------------------------------------------------------------------------------------------------------------------------------------------------------------------------------------------------------------------------------------------|------------------------------------------------------|------------------|------------------------------------------------------------------------------------------------------------------------------------------------------------------------------------------------------------------------------------------------------------------------------------------------------------------------------------------------------------------------------------------------------------------------------|
| 1  | <sup>a</sup> TF1 | 5084595 | 2  | 4.5      | 3.2 | 5.7 | 3.7E-23 | 9   | F:GO:0000166;<br>F:GO:0003824;<br>P:GO:0007275;<br>P:GO:0006629;<br>P:GO:0030154;<br>F:GO:0008289;<br>P:GO:0009058;<br>C:GO:0005622;<br>F:GO:0005215 | F:nucleotide binding;<br>F:catalytic activity;<br>P:multicellular organism development;<br>P:lipid metabolic process;<br>P:cell differentiation;<br>F:lipid binding;<br>P:biosynthetic process;<br>C:intracellular;<br>F:transporter activity | Steroid degradation,<br>Steroid hormone biosynthesis | 11               | EC:1.3.99.5 - 4-dehydrogenase (acceptor),<br>EC:1.1.1.145 - dehydrogenase,<br>EC:1.14.15.4 - 11beta-monooxygenase,<br>EC:1.14.15.5 - 18-monooxygenase,<br>EC:2.8.2.4 - sulfotransferase,<br>EC:2.1.1.6 - O-methyltransferase,<br>EC:1.14.14.1 - monooxygenase,<br>EC:1.1.1.62 - 17-dehydrogenase,<br>EC:1.1.1.239 - dehydrogenase (NAD+),<br>EC:1.1.1.145 - dehydrogenase,<br>EC:2.4.1.17 - 1-naphthol glucuronyltransferase |
| 2  | <sup>a</sup> TF2 | 5084595 | 2  | 4.5      | 4.1 | 7.3 | 3.7E-23 | 9   | F:GO:0000166;<br>F:GO:0003824;<br>P:GO:0007275;<br>P:GO:0006629;<br>P:GO:0030154;<br>F:GO:0008289;<br>P:GO:0009058;<br>C:GO:0005622;<br>F:GO:0005215 | F:nucleotide binding;<br>F:catalytic activity;<br>P:multicellular organism development;<br>P:lipid metabolic process;<br>P:cell differentiation;<br>F:lipid binding;<br>P:biosynthetic process;<br>C:intracellular;<br>F:transporter activity | Steroid degradation,<br>Steroid hormone biosynthesis | 11               | EC:1.3.99.5 - 4-dehydrogenase (acceptor),<br>EC:1.1.1.145 - dehydrogenase,<br>EC:1.14.15.4 - 11beta-monooxygenase,<br>EC:1.14.15.5 - 18-monooxygenase,<br>EC:2.8.2.4 - sulfotransferase,<br>EC:2.1.1.6 - O-methyltransferase,<br>EC:1.14.14.1 - monooxygenase,<br>EC:1.1.1.62 - 17-dehydrogenase,<br>EC:1.1.1.239 - dehydrogenase (NAD+),<br>EC:1.1.1.145 - dehydrogenase,<br>EC:2.4.1.17 - 1-naphthol glucuronyltransferase |
| 3  | <sup>a</sup> EGC | 5124128 | 2  | 7.7      | 3.3 | 5.6 | 2.2E-18 | 1   | F:GO:0005198                                                                                                                                         | F:structural molecule activity                                                                                                                                                                                                                | -                                                    | -                | -                                                                                                                                                                                                                                                                                                                                                                                                                            |
| 4  | <sup>a</sup> ECG | 5098382 | 6  | 57       | 5.2 | 8.7 | 5.5E-19 | 8   | F:GO:0003723;<br>F:GO:0005515;<br>P:GO:0007275;<br>P:GO:0009653;<br>C:GO:0005730;<br>P:GO:0006139;<br>C:GO:0005654;<br>F:GO:0016787                  | F:RNA binding;<br>F:protein binding;<br>P:multicellular organism development;<br>P:anatomical structure morphogenesis;<br>C:nucleolus;<br>P:nucleobase-containing compound metabolic                                                          | Purine metabolism                                    | 15               | EC:4.6.1.1 - cyclase,<br>EC:4.6.1.2 - cyclase,<br>EC:2.7.4.6 - kinase,<br>EC:2.7.4.3 - kinase,<br>EC:3.6.1.3 - adenylypyrophosphatase,<br>EC:3.1.4.17 - phosphodiesterase,<br>EC:3.5.4.4 - deaminase,<br>EC:2.7.1.4 - kinase,<br>EC:3.5.4.6 - deaminase,                                                                                                                                                                     |

|    |                   |         |    |      |     |     |         |    |                                                                                                                                                                                                                                           |                                                                                                                                                                                                                                                                                                                                                                          |   |   |   |                                                                                                                                                                                                                                      |
|----|-------------------|---------|----|------|-----|-----|---------|----|-------------------------------------------------------------------------------------------------------------------------------------------------------------------------------------------------------------------------------------------|--------------------------------------------------------------------------------------------------------------------------------------------------------------------------------------------------------------------------------------------------------------------------------------------------------------------------------------------------------------------------|---|---|---|--------------------------------------------------------------------------------------------------------------------------------------------------------------------------------------------------------------------------------------|
|    |                   |         |    |      |     |     |         |    |                                                                                                                                                                                                                                           | process; C:nucleoplasm;<br>F:hydrolase activity                                                                                                                                                                                                                                                                                                                          |   |   |   | EC:3.1.4.35 - phosphodiesterase,<br>EC:2.7.1.2- - kinase,<br>EC:3.6.1.15 - phosphatase,<br>EC:5.4.2.2 - (alpha-D-glucose-1,6-<br>bisphosphate-dependent),<br>EC:2.7.6.1 - diphosphokinase,<br>EC:2.4.2.8 - phosphoribosyltransferase |
| 5  | <sup>a</sup> TF1  | 5136045 | 6  | 69.6 | 4.3 | 7.7 | 5.5E-19 | 1  | F:GO:0005515                                                                                                                                                                                                                              | F:protein binding                                                                                                                                                                                                                                                                                                                                                        | - | - | - | -                                                                                                                                                                                                                                    |
| 6  | <sup>a</sup> CAFF | 5111497 | 8  | 18.8 | 4.1 | 7.1 | 3.7E-23 | 4  | P:GO:0008150;<br>F:GO:0005515;<br>C:GO:0005737;<br>C:GO:0005576                                                                                                                                                                           | P:biological_process;<br>F:protein binding;<br>C:cytoplasm;<br>C:extracellular region                                                                                                                                                                                                                                                                                    | - | - | - | -                                                                                                                                                                                                                                    |
| 7  | <sup>a</sup> CAT  | 5103784 | 13 | 50.6 | 3.8 | 6.1 | 5.5E-19 | 14 | P:GO:0007275;<br>P:GO:0007165;<br>P:GO:0008152;<br>P:GO:0007267;<br>C:GO:0005886;<br>P:GO:0007049;<br>C:GO:0005635;<br>C:GO:0005856;<br>F:GO:0005515;<br>P:GO:0008219;<br>C:GO:0005737;<br>P:GO:0009719;<br>P:GO:0016043;<br>P:GO:0030154 | P:multicellular organism<br>development;<br>P:signal transduction;<br>P:metabolic process;<br>P:cell-cell signaling;<br>C:plasma membrane;<br>P:cell cycle;<br>C:nuclear envelope;<br>C:cytoskeleton;<br>F:protein binding;<br>P:cell death;<br>C:cytoplasm;<br>P:response to<br>endogenous stimulus;<br>P:cellular component<br>organization;<br>P:cell differentiation | - | - | - | -                                                                                                                                                                                                                                    |
| 8  | <sup>a</sup> CAT  | 5122899 | 13 | 50.5 | 3.8 | 6   | 3.7E-23 | 5  | F:GO:0005515;<br>P:GO:0007275;<br>P:GO:0030154;<br>C:GO:0005886;<br>F:GO:0005215                                                                                                                                                          | F:protein binding;<br>P:multicellular organism<br>development;<br>P:cell differentiation;<br>C:plasma membrane;<br>F:transporter activity                                                                                                                                                                                                                                | - | - | - | -                                                                                                                                                                                                                                    |
| 9  | <sup>a</sup> ECG  | 5123761 | 13 | 60.7 | 3.3 | 5.8 | 3.6E-20 | 2  | F:GO:0003700;<br>C:GO:0005622                                                                                                                                                                                                             | F:transcription factor<br>activity, sequence-<br>specific DNA binding;<br>C:intracellular                                                                                                                                                                                                                                                                                | - | - | - | -                                                                                                                                                                                                                                    |
| 10 | <sup>a</sup> BRT  | 5135810 | 13 | 26   | 2.8 | 5.8 | 1.3E-13 | 4  | C:GO:0005623;<br>P:GO:0019538;                                                                                                                                                                                                            | C:cell;                                                                                                                                                                                                                                                                                                                                                                  | - | - | - | -                                                                                                                                                                                                                                    |

|    |                   |         |    |      |     |      |         |    |                                                                                                                                                                                                                                                                                                                                                  |                                                                                                                                                                                                                                                                                                                                                                                  |   |   |   |
|----|-------------------|---------|----|------|-----|------|---------|----|--------------------------------------------------------------------------------------------------------------------------------------------------------------------------------------------------------------------------------------------------------------------------------------------------------------------------------------------------|----------------------------------------------------------------------------------------------------------------------------------------------------------------------------------------------------------------------------------------------------------------------------------------------------------------------------------------------------------------------------------|---|---|---|
|    |                   |         |    |      |     |      |         |    | F:GO:0005515;<br>F:GO:0016787                                                                                                                                                                                                                                                                                                                    | P:protein metabolic process;<br>F:protein binding;<br>F:hydrolase activity                                                                                                                                                                                                                                                                                                       |   |   |   |
| 11 | <sup>a</sup> CAFF | 5054639 | 14 | 6.4  | 3.9 | 6.9  | 5.0E-10 | 12 | C:GO:0005615;<br>P:GO:0009628;<br>P:GO:0008219;<br>P:GO:0007275;<br>C:GO:0005737;<br>P:GO:0009719;<br>P:GO:0007267;<br>P:GO:0016043;<br>P:GO:0030154;<br>P:GO:0009653;<br>F:GO:0005102;<br>P:GO:0006950                                                                                                                                          | C:extracellular space;<br>P:response to abiotic stimulus;<br>P:cell death;<br>P:multicellular organism development;<br>C:cytoplasm;<br>P:response to endogenous stimulus;<br>P:cell-cell signaling;<br>P:cellular component organization;<br>P:cell differentiation;<br>P:anatomical structure morphogenesis;<br>F:receptor binding;<br>P:response to stress                     | - | - | - |
| 12 | <sup>a</sup> CAT  | 5132370 | 14 | 60.7 | 6.5 | 10.8 | 1.5E-25 | 26 | P:GO:0007275;<br>P:GO:0009991;<br>P:GO:0006464;<br>F:GO:0008289;<br>P:GO:0009653;<br>P:GO:0009058;<br>P:GO:0009607;<br>P:GO:0009628;<br>F:GO:0003723;<br>P:GO:0008219;<br>P:GO:0007165;<br>P:GO:0006259;<br>F:GO:0005102;<br>P:GO:0006810;<br>P:GO:0006950;<br>P:GO:0000003;<br>P:GO:0007049;<br>P:GO:0040007;<br>C:GO:0005634;<br>F:GO:0003677; | P:multicellular organism development;<br>P:response to extracellular stimulus;<br>P:cellular protein modification process;<br>F:lipid binding;<br>P:anatomical structure morphogenesis;<br>P:biosynthetic process;<br>P:response to biotic stimulus;<br>P:response to abiotic stimulus;<br>F:RNA binding;<br>P:cell death;<br>P:signal transduction;<br>P:DNA metabolic process; | - | - | - |

|    |                  |         |    |      |     |     |         |    |                                                                                                                                                                                                                                                                                                                                                                                                                      |                                                                                                                                                                                                                                                                                                                                                                                                                                                                                                                        |   |   |   |
|----|------------------|---------|----|------|-----|-----|---------|----|----------------------------------------------------------------------------------------------------------------------------------------------------------------------------------------------------------------------------------------------------------------------------------------------------------------------------------------------------------------------------------------------------------------------|------------------------------------------------------------------------------------------------------------------------------------------------------------------------------------------------------------------------------------------------------------------------------------------------------------------------------------------------------------------------------------------------------------------------------------------------------------------------------------------------------------------------|---|---|---|
|    |                  |         |    |      |     |     |         |    | C:GO:0005615;<br>C:GO:0005737;<br>P:GO:0009719;<br>P:GO:0016043;<br>P:GO:0030154;<br>F:GO:0016740                                                                                                                                                                                                                                                                                                                    | F:receptor binding;<br>P:transport;<br>P:response to stress;<br>P:reproduction;<br>P:cell cycle;<br>P:growth;<br>C:nucleus;<br>F:DNA binding;<br>C:extracellular space;<br>C:cytoplasm;<br>P:response to<br>endogenous stimulus;<br>P:cellular component<br>organization;<br>P:cell differentiation;<br>F:transferase activity                                                                                                                                                                                         |   |   |   |
| 13 | <sup>a</sup> EGC | 5132370 | 14 | 60.7 | 3.7 | 6.4 | 1.5E-25 | 26 | P:GO:0007275;<br>P:GO:0009991;<br>P:GO:0006464;<br>F:GO:0008289;<br>P:GO:0009653;<br>P:GO:0009058;<br>P:GO:0009607;<br>P:GO:0009628;<br>F:GO:0003723;<br>P:GO:0008219;<br>P:GO:0007165;<br>P:GO:0006259;<br>F:GO:0005102;<br>P:GO:0006810;<br>P:GO:0006950;<br>P:GO:0000003;<br>P:GO:0007049;<br>P:GO:0040007;<br>C:GO:0005634;<br>F:GO:0003677;<br>C:GO:0005615;<br>C:GO:0005737;<br>P:GO:0009719;<br>P:GO:0016043; | P:multicellular organism<br>development;<br>P:response to<br>extracellular stimulus;<br>P:cellular protein<br>modification process;<br>F:lipid binding;<br>P:anatomical structure<br>morphogenesis;<br>P:biosynthetic process;<br>P:response to biotic<br>stimulus;<br>P:response to abiotic<br>stimulus;<br>F:RNA binding;<br>P:cell death;<br>P:signal transduction;<br>P:DNA metabolic<br>process;<br>F:receptor binding;<br>P:transport;<br>P:response to stress;<br>P:reproduction;<br>P:cell cycle;<br>P:growth; | - | - | - |



|    |                   |         |    |      |     |     |         |   |                                                                                                                                                      |                                                                                                                                                                                                                                                     |                                                               |    |                                                                                                                                                                                                                                                                                                                                                                                                                                    |
|----|-------------------|---------|----|------|-----|-----|---------|---|------------------------------------------------------------------------------------------------------------------------------------------------------|-----------------------------------------------------------------------------------------------------------------------------------------------------------------------------------------------------------------------------------------------------|---------------------------------------------------------------|----|------------------------------------------------------------------------------------------------------------------------------------------------------------------------------------------------------------------------------------------------------------------------------------------------------------------------------------------------------------------------------------------------------------------------------------|
|    |                   |         |    |      |     |     |         |   | P:GO:0030154;<br>F:GO:0016740                                                                                                                        | C:nucleus;<br>F:DNA binding;<br>C:extracellular space;<br>C:cytoplasm;<br>P:response to<br>endogenous stimulus;<br>P:cellular component<br>organization;<br>P:cell differentiation;<br>F:transferase activity                                       |                                                               |    |                                                                                                                                                                                                                                                                                                                                                                                                                                    |
| 14 | <sup>a</sup> EGCG | 5114089 | 15 | 32.1 | 4   | 6.8 | 8.0E-12 | 5 | C:GO:0005634;<br>F:GO:0003700;<br>P:GO:0007275;<br>P:GO:0009058;<br>P:GO:0006139                                                                     | C:nucleus;<br>F:transcription factor<br>activity, sequence-<br>specific DNA binding;<br>P:multicellular organism<br>development;<br>P:biosynthetic process;<br>P:nucleobase-containing<br>compound metabolic<br>process                             | -                                                             | -  | -                                                                                                                                                                                                                                                                                                                                                                                                                                  |
| 15 | <sup>b</sup> TF1  | 5084595 | 2  | 4.5  | 3.2 | 5.7 | 3.7E-23 | 9 | F:GO:0000166;<br>F:GO:0003824;<br>P:GO:0007275;<br>P:GO:0006629;<br>P:GO:0030154;<br>F:GO:0008289;<br>P:GO:0009058;<br>C:GO:0005622;<br>F:GO:0005215 | F:nucleotide binding;<br>F:catalytic activity;<br>P:multicellular organism<br>development;<br>P:lipid metabolic<br>process;<br>P:cell differentiation;<br>F:lipid binding;<br>P:biosynthetic process;<br>C:intracellular;<br>F:transporter activity | Steroid<br>degradation,<br>Steroid<br>hormone<br>biosynthesis | 11 | EC:1.3.99.5 - 4-dehydrogenase<br>(acceptor),<br>EC:1.1.1.145 - dehydrogenase,<br>EC:1.14.15.4 - 11beta-monooxygenase,<br>EC:1.14.15.5 - 18-monooxygenase,<br>EC:2.8.2.4 - sulfotransferase,<br>EC:2.1.1.6 - O-methyltransferase,<br>EC:1.14.14.1 - monooxygenase,<br>EC:1.1.1.62 - 17-dehydrogenase,<br>EC:1.1.1.239 - dehydrogenase (NAD+),<br>EC:1.1.1.145 - dehydrogenase,<br>EC:2.4.1.17 - 1-naphthol<br>glucuronyltransferase |
| 16 | <sup>b</sup> TF2  | 5084595 | 2  | 4.5  | 4.1 | 7.3 | 3.7E-23 | 9 | F:GO:0000166;<br>F:GO:0003824;<br>P:GO:0007275;<br>P:GO:0006629;<br>P:GO:0030154;<br>F:GO:0008289;<br>P:GO:0009058;                                  | F:nucleotide binding;<br>F:catalytic activity;<br>P:multicellular organism<br>development;<br>P:lipid metabolic<br>process;<br>P:cell differentiation;<br>F:lipid binding;                                                                          | Steroid<br>degradation,<br>Steroid<br>hormone<br>biosynthesis | 11 | EC:1.3.99.5 - 4-dehydrogenase<br>(acceptor),<br>EC:1.1.1.145 - dehydrogenase,<br>EC:1.14.15.4 - 11beta-monooxygenase,<br>EC:1.14.15.5 - 18-monooxygenase,<br>EC:2.8.2.4 - sulfotransferase,<br>EC:2.1.1.6 - O-methyltransferase,                                                                                                                                                                                                   |

|    |                  |         |    |      |     |      |         |    |                                                                                                                                                                                                                                                                                               |                                                                                                                                                                                                                                                                                                                                              |                      |    |                                                                                                                                                                                                                                                                                                                                                                                                                                                                                                   |
|----|------------------|---------|----|------|-----|------|---------|----|-----------------------------------------------------------------------------------------------------------------------------------------------------------------------------------------------------------------------------------------------------------------------------------------------|----------------------------------------------------------------------------------------------------------------------------------------------------------------------------------------------------------------------------------------------------------------------------------------------------------------------------------------------|----------------------|----|---------------------------------------------------------------------------------------------------------------------------------------------------------------------------------------------------------------------------------------------------------------------------------------------------------------------------------------------------------------------------------------------------------------------------------------------------------------------------------------------------|
|    |                  |         |    |      |     |      |         |    | C:GO:0005622;<br>F:GO:0005215                                                                                                                                                                                                                                                                 | P:biosynthetic process;<br>C:intracellular;<br>F:transporter activity                                                                                                                                                                                                                                                                        |                      |    | EC:1.14.14.1 - monooxygenase,<br>EC:1.1.1.62 - 17-dehydrogenase,<br>EC:1.1.1.239 - dehydrogenase (NAD+),<br>EC:1.1.1.145 - dehydrogenase,<br>EC:2.4.1.17 - 1-naphthol<br>glucuronyltransferase                                                                                                                                                                                                                                                                                                    |
| 17 | <sup>b</sup> EGC | 5124128 | 2  | 7.7  | 3.3 | 5.6  | 2.2E-18 | 1  | F:GO:0005198                                                                                                                                                                                                                                                                                  | F:structural molecule<br>activity                                                                                                                                                                                                                                                                                                            | -                    | -  | -                                                                                                                                                                                                                                                                                                                                                                                                                                                                                                 |
| 18 | <sup>b</sup> ECG | 5098382 | 6  | 57   | 5.2 | 8.7  | 5.5E-19 | 8  | F:GO:0003723;<br>F:GO:0005515;<br>P:GO:0007275;<br>P:GO:0009653;<br>C:GO:0005730;<br>P:GO:0006139;<br>C:GO:0005654;<br>F:GO:0016787                                                                                                                                                           | F:RNA binding;<br>F:protein binding;<br>P:multicellular organism<br>development;<br>P:anatomical structure<br>morphogenesis;<br>C:nucleolus;<br>P:nucleobase-containing<br>compound metabolic<br>process;<br>C:nucleoplasm;<br>F:hydrolase activity                                                                                          | Purine<br>metabolism | 15 | EC:4.6.1.1 - cyclase,<br>EC:4.6.1.2 - cyclase,<br>EC:2.7.4.6 - kinase,<br>EC:2.7.4.3 - kinase,<br>EC:3.6.1.3 - adenylypyrophosphatase,<br>EC:3.1.4.17 - phosphodiesterase,<br>EC:3.5.4.4 - deaminase,<br>EC:2.7.1.4- - kinase,<br>EC:3.5.4.6 - deaminase,<br>EC:3.1.4.35 - phosphodiesterase,<br>EC:2.7.1.2- - kinase,<br>EC:3.6.1.15 - phosphatase,<br>EC:5.4.2.2 - (alpha-D-glucose-1,6-<br>bisphosphate-dependent),<br>EC:2.7.6.1 - diphosphokinase,<br>EC:2.4.2.8 - phosphoribosyltransferase |
| 19 | <sup>b</sup> CAT | 5132370 | 14 | 60.7 | 6.5 | 10.8 | 1.5E-25 | 26 | P:GO:0007275;<br>P:GO:0009991;<br>P:GO:0006464;<br>F:GO:0008289;<br>P:GO:0009653;<br>P:GO:0009058;<br>P:GO:0009607;<br>P:GO:0009628;<br>F:GO:0003723;<br>P:GO:0008219;<br>P:GO:0007165;<br>P:GO:0006259;<br>F:GO:0005102;<br>P:GO:0006810;<br>P:GO:0006950;<br>P:GO:0000003;<br>P:GO:0007049; | P:multicellular organism<br>development;<br>P:response to<br>extracellular stimulus;<br>P:cellular protein<br>modification process;<br>F:lipid binding;<br>P:anatomical structure<br>morphogenesis;<br>P:biosynthetic process;<br>P:response to biotic<br>stimulus;<br>P:response to abiotic<br>stimulus;<br>F:RNA binding;<br>P:cell death; | -                    | -  | -                                                                                                                                                                                                                                                                                                                                                                                                                                                                                                 |

|    |                   |         |    |      |   |     |         |   |                                                                      |                                                                                                                                                                                             |                                                                                                                                                                                                                                                                                                                                   |   |   |  |
|----|-------------------|---------|----|------|---|-----|---------|---|----------------------------------------------------------------------|---------------------------------------------------------------------------------------------------------------------------------------------------------------------------------------------|-----------------------------------------------------------------------------------------------------------------------------------------------------------------------------------------------------------------------------------------------------------------------------------------------------------------------------------|---|---|--|
|    |                   |         |    |      |   |     |         |   |                                                                      | P:GO:0040007; C:GO:0005634; F:GO:0003677; C:GO:0005615; C:GO:0005737; P:GO:0009719; P:GO:0016043; P:GO:0030154; F:GO:0016740                                                                | P:signal transduction; P:DNA metabolic process; F:receptor binding; P:transport; P:response to stress; P:reproduction; P:cell cycle; P:growth; C:nucleus; F:DNA binding; C:extracellular space; C:cytoplasm; P:response to endogenous stimulus; P:cellular component organization; P:cell differentiation; F:transferase activity |   |   |  |
| 20 | <sup>b</sup> EGCG | 5114089 | 15 | 32.1 | 4 | 6.8 | 8.0E-12 | 5 | C:GO:0005634; F:GO:0003700; P:GO:0007275; P:GO:0009058; P:GO:0006139 | C:nucleus; F:transcription factor activity, sequence-specific DNA binding; P:multicellular organism development; P:biosynthetic process; P:nucleobase-containing compound metabolic process | -                                                                                                                                                                                                                                                                                                                                 | - | - |  |

18

19 <sup>a</sup> Putative QTL identified in Interval Mapping using Joinmap software v4.1.

20 <sup>b</sup> Putative QTL identified in Multiple QTL Model Mapping using Joinmap software v4.1

21 P (biological process); F (molecular function); C (cellular component)

22 (-) Not found in KEGG pathway

23 Supplementary Table 2. List of unigenes from primary and secondary metabolic pathways in 15 LGs of *C. sinensis* transcriptome

| Nr | Pathway                                     | #Enzs in Pathway | Enzyme                                                         | #Unigene | Unigene ID                                                    |
|----|---------------------------------------------|------------------|----------------------------------------------------------------|----------|---------------------------------------------------------------|
| 1  | Alanine, aspartate and glutamate metabolism | 4                | EC:4.1.1.15 - decarboxylase, EC:6.3.4.16 - synthase (ammonia), | 7        | 5134557, 5082783, 5134557, 5082783, 5134840, 5098250, 5125548 |

|    |                                             |   |                                                                                                                                                                                                                   |   |                                                                                       |
|----|---------------------------------------------|---|-------------------------------------------------------------------------------------------------------------------------------------------------------------------------------------------------------------------|---|---------------------------------------------------------------------------------------|
|    |                                             |   | EC:1.4.1.2 - dehydrogenase,<br>EC:2.6.1.44 - transaminase                                                                                                                                                         |   |                                                                                       |
| 2  | Amino sugar and nucleotide sugar metabolism | 3 | EC:5.4.2.2 - (alpha-D-glucose-1,6-bisphosphate-dependent),<br>EC:2.7.1.2 - glucokinase (phosphorylating), EC:2.7.1.1 - hexokinase<br>type IV glucokinase                                                          | 4 | 5122964, 5077455, 5134772, 5134772                                                    |
| 3  | Arginine and proline metabolism             | 4 | EC:4.1.1.50 - decarboxylase,<br>EC:1.14.13.39 - synthase (NADPH),<br>EC:3.5.3.1 - arginine amidinase,<br>EC:1.2.1.3 - dehydrogenase (NAD+)                                                                        | 5 | 5124570, 5133545, 5124506, 5109744,<br>5123629                                        |
| 4  | Arginine biosynthesis                       | 6 | EC:1.14.13.39 - synthase (NADPH),<br>EC:3.5.3.1 - arginine amidinase,<br>EC:6.3.4.16 - synthase (ammonia),<br>EC:2.1.3.3 - carbamoyltransferase, EC:1.4.1.2 - dehydrogenase,<br>EC:3.5.1.14 - acid amidohydrolase | 8 | 5133545, 5124506, 5109744, 5134557,<br>5082783, 5098949, 5134840, 5080820             |
| 5  | Ascorbate and aldarate metabolism           | 2 | EC:2.4.1.17 - 1-naphthol glucuronyltransferase, EC:1.2.1.3 -<br>dehydrogenase (NAD+)                                                                                                                              | 3 | 5075058, 5084636, 5123629                                                             |
| 6  | Carbon fixation in photosynthetic organisms | 2 | EC:4.1.2.13 - aldolase,<br>EC:1.1.1.37 - dehydrogenase                                                                                                                                                            | 5 | 5106931, 5084452, 5133604, 5124439,<br>5132470                                        |
| 7  | Cysteine and methionine metabolism          | 5 | EC:4.1.1.50 - decarboxylase,<br>EC:1.1.1.37 - dehydrogenase,<br>EC:4.2.1.22 - beta-synthase,<br>EC:1.1.1.27 - dehydrogenase,<br>EC:2.6.1.44 - transaminase                                                        | 9 | 5124570, 5133604, 5124439, 5132470,<br>5112205, 5123470, 5133941, 5098250,<br>5125548 |
| 8  | Flavone and flavonol biosynthesis           | 1 | EC:3.2.1.31 - beta-glucuronide glucuronohydrolase glucuronidase                                                                                                                                                   | 2 | 5072939, 5068701                                                                      |
| 9  | Fructose and mannose metabolism             | 4 | EC:4.1.2.13 - aldolase,<br>EC:3.2.1.78 - endo-1,4-beta-mannosidase,<br>EC:1.1.1.21 - reductase,<br>EC:2.7.1.1 - hexokinase type IV glucokinase                                                                    | 6 | 5106931, 5084452, 5059558, 5127501,<br>5123251, 5134772                               |
| 10 | Glycerolipid metabolism                     | 5 | EC:2.7.1.107 - kinase (ATP),<br>EC:1.1.1.2 - dehydrogenase (NADP+),                                                                                                                                               | 6 | 5137030, 5123251, 5123251, 5134984,<br>5065613, 5123629                               |

|    |                                          |   |                                                                                                                                                                                                                        |    |                                                                                                                                                                                                      |
|----|------------------------------------------|---|------------------------------------------------------------------------------------------------------------------------------------------------------------------------------------------------------------------------|----|------------------------------------------------------------------------------------------------------------------------------------------------------------------------------------------------------|
|    |                                          |   | EC:1.1.1.21 - reductase,<br>EC:3.1.1.3 - lipase, EC:1.2.1.3 - dehydrogenase (NAD+)                                                                                                                                     |    |                                                                                                                                                                                                      |
| 11 | Glycine, serine and threonine metabolism | 3 | EC:4.2.1.22 - beta-synthase,<br>EC:2.6.1.51 - transaminase,<br>EC:2.6.1.44 - transaminase                                                                                                                              | 5  | 5112205, 5098250, 5125548, 5098250, 5125548                                                                                                                                                          |
| 12 | Glyoxylate and dicarboxylate metabolism  | 3 | EC:6.4.1.3 - carboxylase,<br>EC:2.3.1.9 - C-acetyltransferase,<br>EC:1.1.1.37 - dehydrogenase                                                                                                                          | 5  | 5122912, 5124564, 5133604, 5124439, 5132470                                                                                                                                                          |
| 13 | Histidine metabolism                     | 1 | EC:1.2.1.3 - dehydrogenase (NAD+)                                                                                                                                                                                      | 1  | 5123629                                                                                                                                                                                              |
|    | mTOR signaling pathway                   | 1 | EC:2.7.11.24 - protein kinase                                                                                                                                                                                          | 1  | 5132197                                                                                                                                                                                              |
|    | Nitrogen metabolism                      | 2 | EC:6.3.4.16 - synthase (ammonia),<br>EC:1.4.1.2 - dehydrogenase                                                                                                                                                        | 3  | 5134557, 5082783, 5134840                                                                                                                                                                            |
| 14 | Other glycan degradation                 | 2 | EC:3.2.1.25 - mannanase,<br>EC:3.2.1.18 - neuraminidase                                                                                                                                                                | 3  | 5059558, 5127501, 5055477                                                                                                                                                                            |
| 15 | Pentose and glucuronate interconversions | 4 | EC:1.1.1.2 - dehydrogenase (NADP+),<br>EC:3.2.1.31 - beta-glucuronide glucuronohydrolase glucuronidase,<br>EC:1.1.1.21 - reductase,<br>EC:2.4.1.17 - 1-naphthol glucuronyltransferase                                  | 6  | 5123251, 5072939, 5068701, 5123251, 5075058, 5084636                                                                                                                                                 |
| 16 | Phosphatidylinositol signaling system    | 2 | EC:2.7.1.107 - kinase (ATP),<br>EC:3.1.4.11 - phospholipase C                                                                                                                                                          | 1  | 5137030, 5122970                                                                                                                                                                                     |
| 17 | Porphyrin and chlorophyll metabolism     | 3 | EC:4.2.1.24 - synthase,<br>EC:3.2.1.31 - beta-glucuronide glucuronohydrolase glucuronidase,<br>EC:2.4.1.17 - 1-naphthol glucuronyltransferase                                                                          | 3  | 5132295, 5072939, 5068701, 5075058, 5084636                                                                                                                                                          |
| 18 | Purine metabolism                        | 6 | EC:3.6.1.15 - phosphatase,<br>EC:2.7.4.3 - kinase,<br>EC:3.6.1.3 - adenylypyrophosphatase,<br>EC:5.4.2.2 - (alpha-D-glucose-1,6-bisphosphate-dependent),<br>EC:3.1.4.17 - phosphodiesterase,<br>EC:3.5.4.4 - deaminase | 22 | 5123251, 5090210, 5133369, 5125437, 5082614, 5118156, 5105900, 5078215, 5134705, 5137364, 5113142, 5136410, 5125437, 5090210, 5133369, 5105900, 5078215, 5122964, 5077455, 5123174, 5075058, 5098382 |

|    |                                                     |   |                                                                                                                                                                    |    |                                                                                                                  |
|----|-----------------------------------------------------|---|--------------------------------------------------------------------------------------------------------------------------------------------------------------------|----|------------------------------------------------------------------------------------------------------------------|
| 19 | Pyruvate metabolism                                 | 5 | EC:2.3.1.9 - C-acetyltransferase,<br>EC:1.1.1.37 - dehydrogenase,<br>EC:4.4.1.5 - lyase,<br>EC:1.1.1.27 - dehydrogenase,<br>EC:1.2.1.3 - dehydrogenase (NAD+)      | 8  | 5124564, 5133604, 5124439, 5132470,<br>5136472, 5123470, 5133941, 5123629                                        |
| 20 | Terpenoid backbone biosynthesis                     | 3 | EC:2.3.3.10 - synthase,<br>EC:2.3.1.9 - C-acetyltransferase,<br>EC:2.5.1.29 - diphosphate synthase                                                                 | 4  | 5125140, 5124564, 5096779, 5072048                                                                               |
| 21 | Thiamine metabolism                                 | 2 | EC:3.6.1.15 - phosphatase, EC:2.7.4.3 - kinase                                                                                                                     | 12 | 5123251, 5090210, 5133369, 5125437,<br>5082614, 5118156, 5105900, 5078215,<br>5134705, 5137364, 5113142, 5136410 |
| 22 | Tryptophan metabolism                               | 2 | EC:2.3.1.9 - C-acetyltransferase,<br>EC:1.2.1.3 - dehydrogenase (NAD+)                                                                                             | 2  | 5124564, 5123629                                                                                                 |
| 23 | Tyrosine metabolism                                 | 1 | EC:2.1.1.6 - O-methyltransferase                                                                                                                                   | 2  | 5059558, 5081364                                                                                                 |
| 24 | Ubiquinone and other terpenoid-quinone biosynthesis | 1 | EC:1.6.5.2 - dehydrogenase (quinone)                                                                                                                               | 1  | 5107213                                                                                                          |
| 25 | Valine, leucine and isoleucine degradation          | 5 | EC:2.3.3.10 - synthase,<br>EC:6.4.1.3 - carboxylase,<br>EC:2.3.1.9 - C-acetyltransferase,<br>EC:2.3.1.16 - C-acyltransferase,<br>EC:1.2.1.3 - dehydrogenase (NAD+) | 5  | 5125140, 5122912, 5124564, 5124564,<br>5123629                                                                   |
